# Supplementary material for: Verbascoside attenuates myocardial ischemia/reperfusion-induced ferroptosis following heterotopic heart transplantation via modulating GDF15/GPX4/SLC7A11 pathway
Source: Research Square preprint supplement (doi:10.21203/rs.3.rs-5884708/v1), 2025-04-09
Supplement: Supplementary file 1 [file 2437539ccee608320a967f79.docx]

Fig.2C

Cleaved-caspase3:


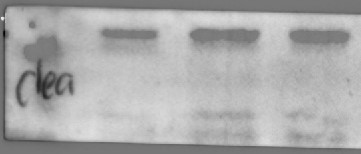


15KD

Bcl-2:


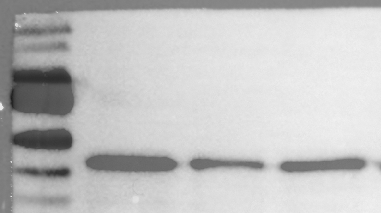


25KD

30KD

BAX:


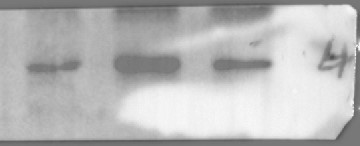


15KD

25KD

β-actin:


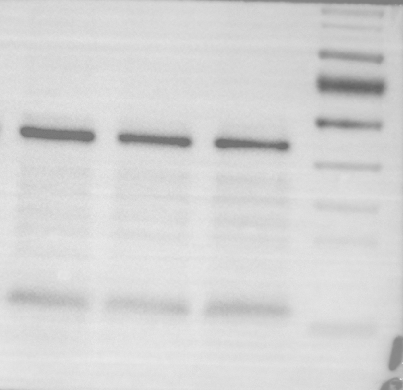


40KD

50KD

Fig.2G

ACSL4:

75KD


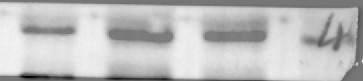


SLC7A11:

75KD


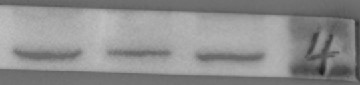


50KD

GPX4:


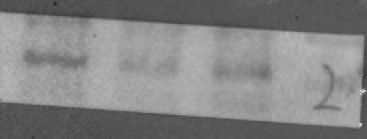


20KD

β-actin:


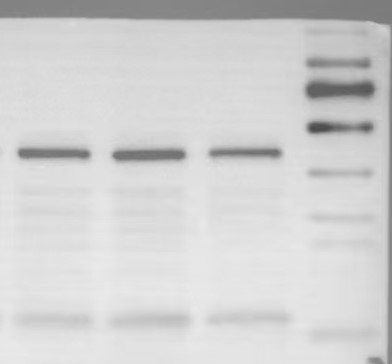


40KD

50KD

Fig.4D

ACSL4:


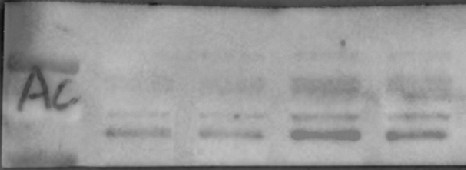


100KD

70KD

SLC7A11:

70KD


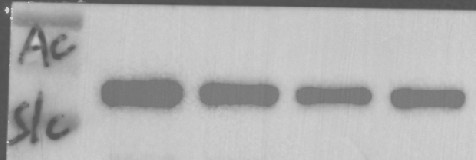


50KD

GPX4:


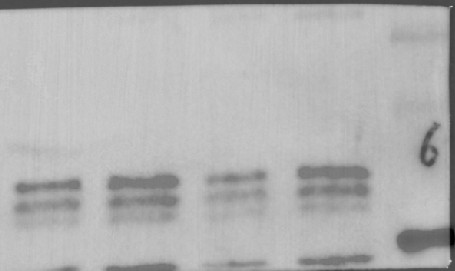


25KD

15KD

β-actin:


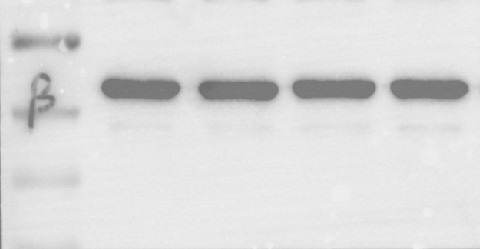


40KD

Fig.5E

GDF15:


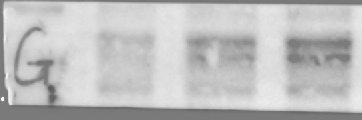


35KD

β-actin:


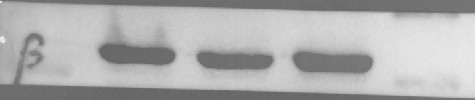


40KD

Fig.5I

GDF15:

35KD


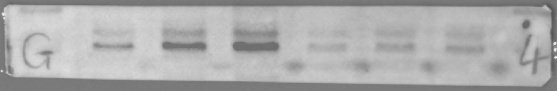


β-actin:


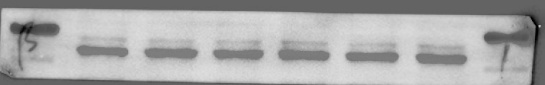


40KD

Fig.5R

ACSL4:


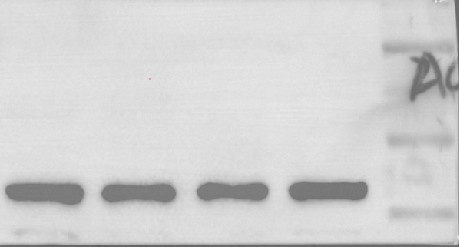


100KD

70KD

SLC7A11:


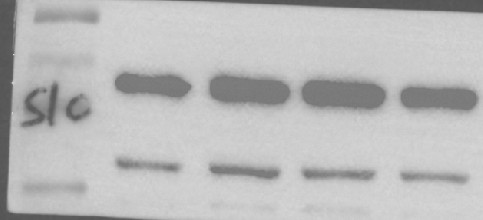


70KD

50KD

GPX4:


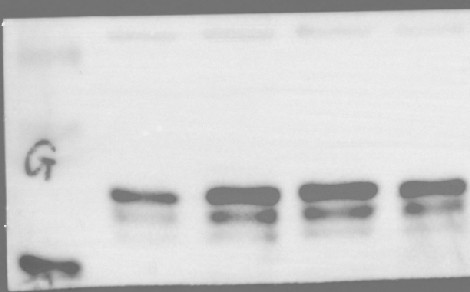


15KD

20KD

β-actin:


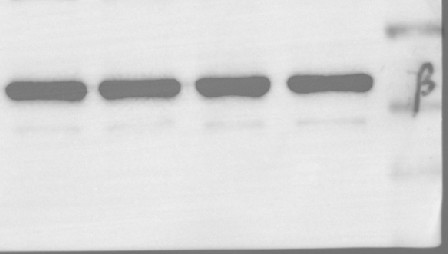


40KD

Fig.6A

GPX4:


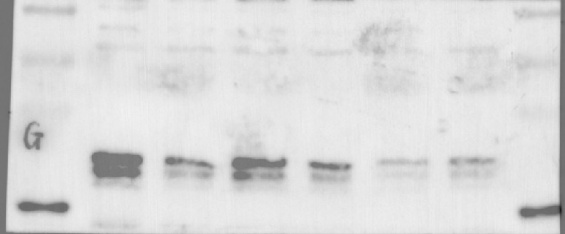


15KD

20KD

β-actin:

40KD


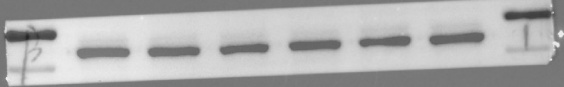


Fig.6J

ACSL4:


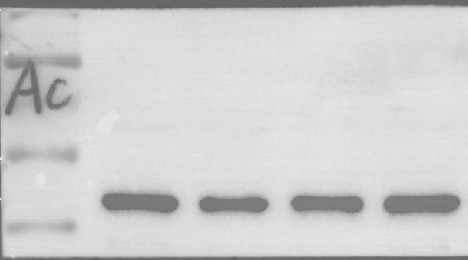


100KD

70KD

SLC7A11:


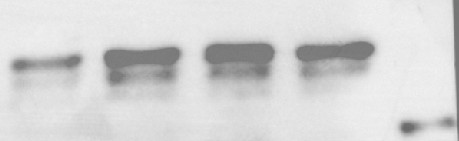


40KD

β-actin:


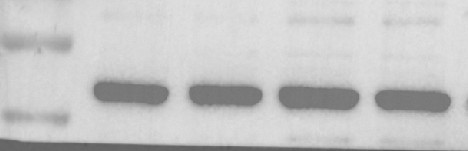


40KD
