# Supplementary material for: Verbascoside attenuates myocardial ischemia/reperfusion-induced ferroptosis following heterotopic heart transplantation via modulating GDF15/GPX4/SLC7A11 pathway
Source: Research Square preprint supplement (doi:10.21203/rs.3.rs-5884708/v1), 2025-04-09
Supplement: Supplementary file 2 [file 66232c7e70552229fedd472c.docx]

Figure S1


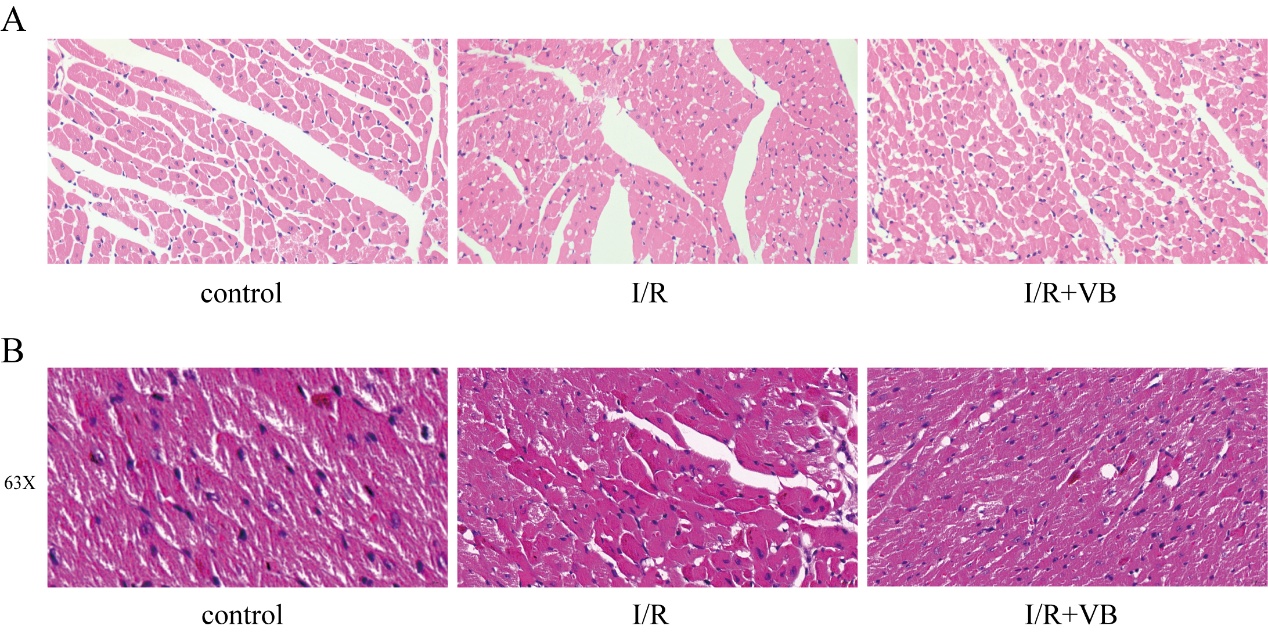


Figure S1. *HE staining.* (A) Additional HE-stained sections showing more pronounced myocardial vacuolization. (B) Maximum magnification of 63X.

Figure S2


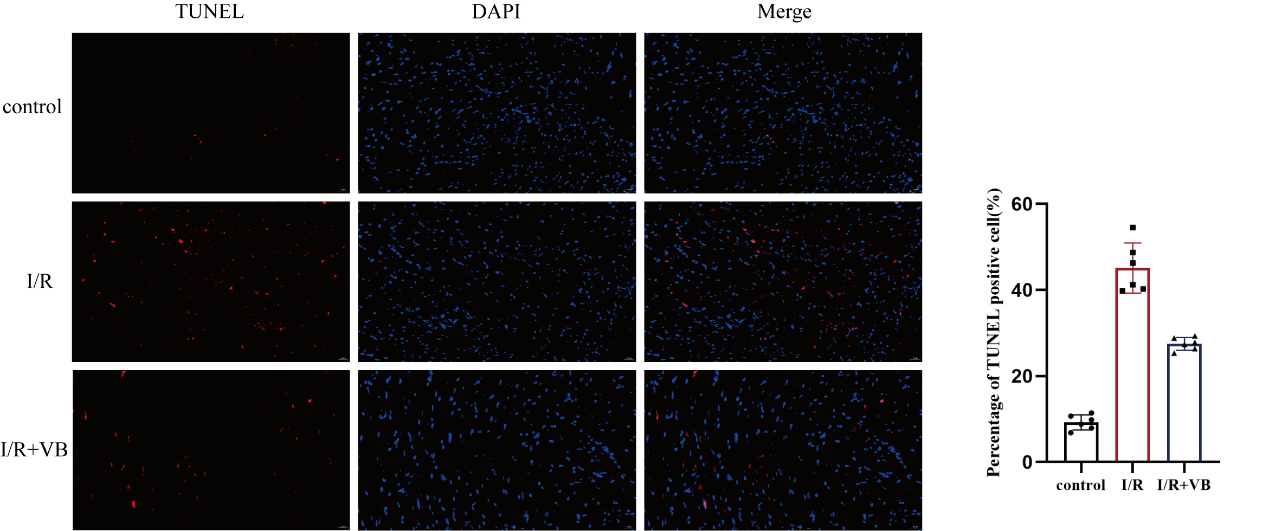


Figure S2. *TUNEL staining.*

Figure S3


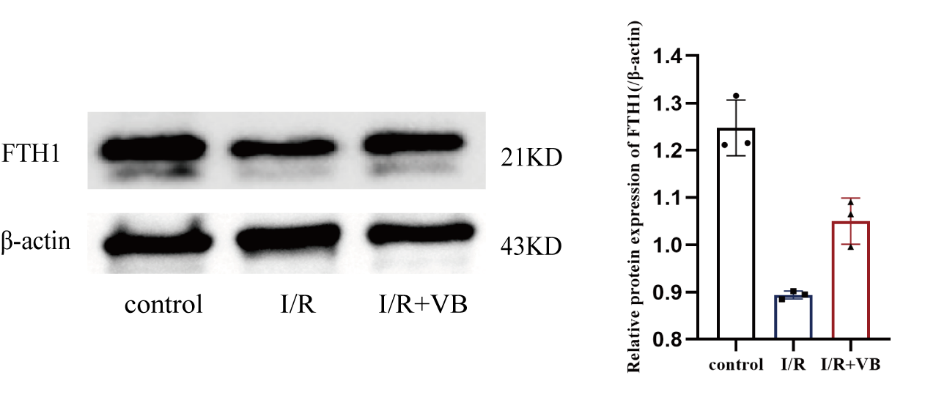


Figure S3. *The protein expression of the* *ferritin heavy chain 1(FTH1).*
