# Supplementary material for: Verbascoside attenuates myocardial ischemia/reperfusion-induced ferroptosis following heterotopic heart transplantation via modulating GDF15/GPX4/SLC7A11 pathway
Source: Research Square preprint supplement (doi:10.21203/rs.3.rs-5884708/v1), 2025-04-09
Supplement: Supplementary file 3 [file a9499c2a617e87ae21b6fcf8.docx]

Figure S1


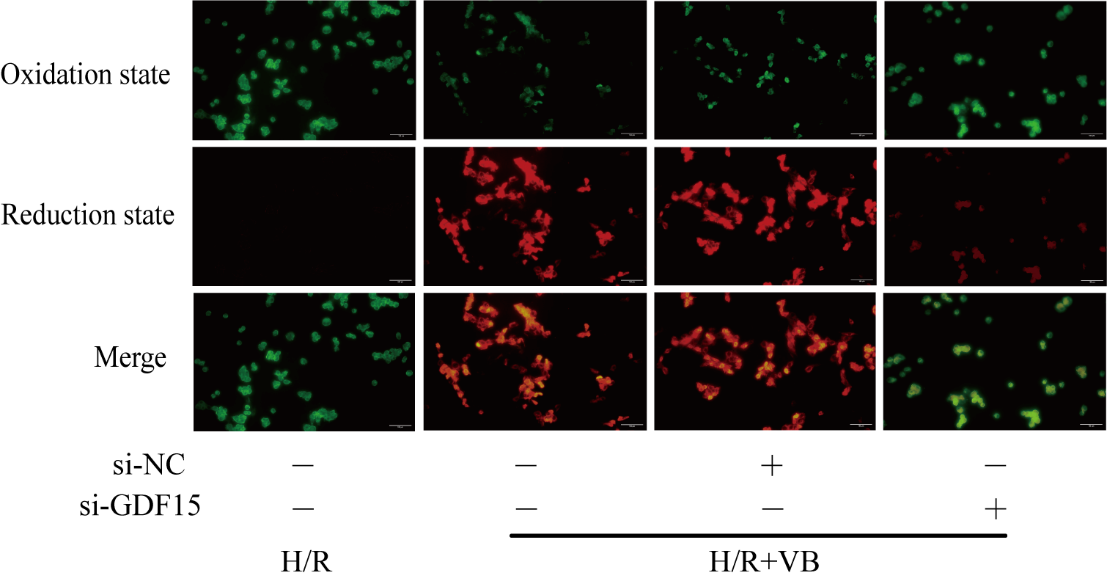


Figure S1. *Lipid peroxidation levels.*

Figure S2


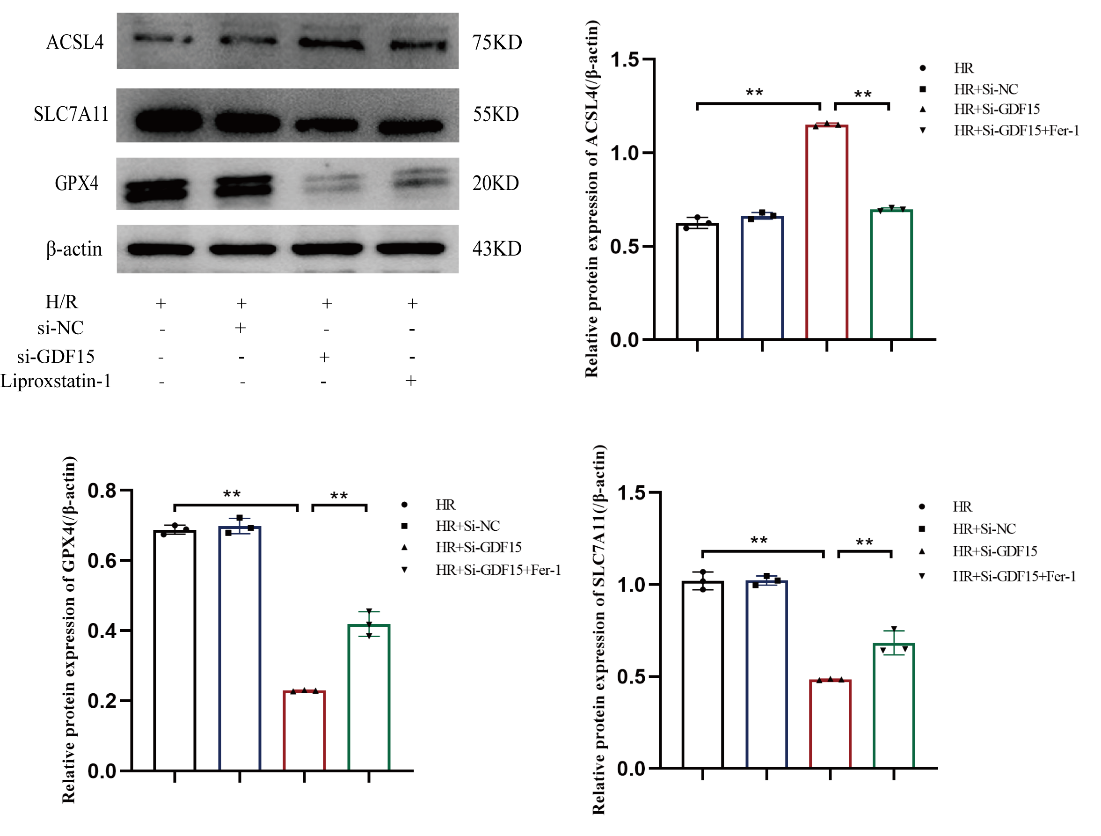


Figure S2. *The expression levels of ACSL4, SLC7A11 and GPX4 with using ferroptosis inhibitor -* *Ferrostatin -1 (Fer-1).*
