# Supplementary material for: Verbascoside attenuates myocardial ischemia/reperfusion-induced ferroptosis following heterotopic heart transplantation via modulating GDF15/GPX4/SLC7A11 pathway
Source: Research Square preprint supplement (doi:10.21203/rs.3.rs-5884708/v1), 2025-04-09
Supplement: Supplementary file 4 [file c13ff85c4d7378c7425bc38d.docx]

**Table1: The sequences of primers used in animal experiment**

| Gene | Forward primer (5′-3′) | Reverse primer (5′-3′) |
| --- | --- | --- |
| IL-10 | AGGCAGTGGAGCAGGTGAAG | CGCTTTGGTGAGTAGACAGAGG |
| IL-1β | CACTACAGGCTCCGAGATGAACAAC | TGTCGTTGCTTGGTTCTCCTTGTAC |
| IL-6 | GGTGTTGCCTGCTGCCTTCC | GTTCTGAAGAGGTGAGTGGCTGTC |
| TNF-α | CGCTCTTCTGTCTACTGAACTTCGG | GTGGTTTGTGAGTGTGAGGGTCTG |
| β-actin | TATGCTCTCCCTCACGCCATCC | GTCACGCACGATTTCCCTCTCAG |

**Table2: The sequences of primers used in cell experiment**

| Gene | Forward primer (5′-3′) | Reverse primer (5′-3′) |
| --- | --- | --- |
| IL-10 | CTGCTATGTTGCCTGCTCTTACTG | GGGTCTGGCTGACTGGGAAG |
| IL-1β | CAGCTTTCGACAGTGAGGAGA | TTGTCGAGATGCTGCTGTGA |
| IL-6 | AGAGACTTCCAGCCAGTTGC | TGCCATTGCACAACTCTTTTC |
| TNF-α | GATCGGTCCCAACAAGGAGG | CTTGGTGGTTTGCTACGACG |
| β-actin | CCCGCGAGTACAACCTTCTTG | GTCATCCATGGCGAACTGGTG |

IL-1β: interleukin-1β; IL-6: interleukin-6; IL-10: interleukin-10; TNF-α: tumor necrosis factor-α
